# Supplementary material for: Colloidal quantum dot based infrared detectors: extending to the mid-infrared and moving from the lab to the field
Source: Royal Society of Chemistry journal article supplement (doi:10.1039/d1tc05359k), 2021-12-08
Supplement: d1tc05359k1.xlsx [file d1tc05359k1.xlsx]

## Sheet: Paper_Info
Paper ID	Title	Year Published	Group	URL
1	Quantum confinement in silver selenide semiconductor nanocrystals Mid-Infrared Transitions in Ag2Se Nanocrystals: Potential and Limitations for Hg-Free Low-Cost Photodetectionconfinement in silver selenide semiconductor nanocrystals	2012	Norris	#https://pubs.rsc.org/en/content/articlelanding/2012/CC/c2cc30539a#!divAbstract
2	Intraband Mid-Infrared Transitions in Ag2Se Nanocrystals: Potential and Limitations for Hg-Free Low-Cost Photodetection	2018	Lhuillier	#https://pubs.acs.org/doi/10.1021/acs.jpcc.8b05699#
3	Mid-Infrared Intraband Transition of Metal Excess Colloidal Ag2Se Nanocrystals	2018	Jeong	#https://pubs.acs.org/doi/10.1021/acsphotonics.8b00291#
4	Silver Selenide Colloidal Quantum Dots for Mid-Wavelength Infrared Photodetection	2019	Ko	#https://pubs.acs.org/doi/10.1021/acsanm.9b00069#
5	Near infrared detectors based on HgSe and HgCdSe quantum dots generated at the liquid–liquid interface	2013	Rao	#https://pubs.rsc.org/en/content/articlelanding/2013/TC/c3tc31344a#!divAbstract
6	Colloidal Quantum Dots Intraband Photodetectors	2014	Guyot-Sionnest	#https://pubs.acs.org/doi/10.1021/nn505092a#
7	Infrared Photodetection Based on Colloidal Quantum-Dot Films with High Mobility and Optical Absorption up to THz	2016	Dubertret	#https://pubs.acs.org/doi/10.1021/acs.nanolett.5b04616#
8	Plasmon resonance enhanced colloidal HgSe quantum dot filterless narrowband photodetectors for mid-wave infrared	2016	Lai	#https://pubs.rsc.org/en/content/articlelanding/2017/TC/C6TC04248A#!divAbstract
9	Filter-Free Narrowband Photodetectors Employing Colloidal Quantum Dots	2017	Wang	#https://ieeexplore.ieee.org/document/8118136#
10	HgSe Self-Doped Nanocrystals as a Platform to Investigate the Effects of Vanishing Confinement	2017	Lhuillier	#https://pubs.acs.org/doi/10.1021/acsami.7b10665#
11	Investigation of the Self‐Doping Process in HgSe Nanocrystals	2017	Lhuillier	#https://onlinelibrary.wiley.com/doi/full/10.1002/pssa.201700294#
12	Multifunctional Self-Doped Nanocrystal Thin-Film Transistor Sensors	2019	Jeong	#https://pubs.acs.org/doi/10.1021/acsami.8b16083#
13	Inkjet‐Printed Nanocrystal Photodetectors Operating up to 3 μm Wavelengths	2007	Heiss	#https://onlinelibrary.wiley.com/doi/abs/10.1002/adma.200700111#
14	Dual-band infrared imaging using stacked colloidal quantum dot photodiodes	2019	Guyot-Sionnest	#https://www.nature.com/articles/s41566-019-0362-1#
15	300 nm Spectral Resolution in the Mid-Infrared with Robust, High Responsivity Flexible Colloidal Quantum Dot Devices at Room Temperature	2018	Halpert	#https://pubs.acs.org/doi/10.1021/acsphotonics.8b00738#
16	Background limited mid-infrared photodetection with photovoltaic HgTe colloidal quantum dots	2015	Guyot-Sionnest	#https://aip.scitation.org/doi/10.1063/1.4938135#
17	Design of a Unipolar Barrier for a Nanocrystal-Based Short-Wave Infrared Photodiode	2018	Lhuillier	#https://pubs.acs.org/doi/10.1021/acsphotonics.8b01032#
18	Energy Level Modification in Lead Sulfide Quantum Dot Thin Films through Ligand Exchange	2014	Bulovic	#https://pubs.acs.org/doi/10.1021/nn500897c#
19	High‐Performance Broadband Photodetector Using Solution‐Processible PbSe–TiO2–Graphene Hybrids	2012	Loh	#https://onlinelibrary.wiley.com/doi/full/10.1002/adma.201104399#
20	Improved photoelectronic performance of graphene, polymer and PbSe quantum dot infrared photodetectors	2016	Yao	#https://www.sciencedirect.com/science/article/pii/S0167577X16307005?via%3Dihub#
21	Mercury Telluride Colloidal Quantum Dots: Electronic Structure, Size-Dependent Spectra, and Photocurrent Detection up to 12 μm	2014	Allan	#https://pubs.acs.org/doi/10.1021/nn503805h#
22	Mid-infrared HgTe colloidal quantum dot photodetectors	2011	Guyot-Sionnest	#https://www.nature.com/articles/nphoton.2011.142#
23	Mid‐Infrared HgTe/As2S3 Field Effect Transistors and Photodetectors	2012	Guyot-Sionnest	#https://onlinelibrary.wiley.com/doi/full/10.1002/adma.201203012#
24	Mid-IR colloidal quantum dot detectors enhanced by optical nano-antennas	2017	Guyot-Sionnest	#https://aip.scitation.org/doi/10.1063/1.4975058#
25	Phase-Transfer Ligand Exchange of Lead Chalcogenide Quantum Dots for Direct Deposition of Thick, Highly Conductive Films	2017	Pietryga	#https://pubs.acs.org/doi/10.1021/jacs.7b01327#
26	Solution-Processed Flexible Broadband Photodetectors with Solution-Processed Transparent Polymeric Electrode	2020	Gong	#https://onlinelibrary.wiley.com/doi/full/10.1002/adfm.201909487#
27	Solution-Processed PbSe Colloidal Quantum Dot-Based Near-Infrared Photodetector	2015	Zou	#https://ieeexplore.ieee.org/document/7004038#
28	Terahertz HgTe Nanocrystals: Beyond Confinement	2018	Lhuillier	#https://pubs.acs.org/doi/10.1021/jacs.8b02039#
29	Thermal imaging with plasmon resonance enhanced HgTe colloidal quantum dot photovoltaic devices	2018	Guyot-Sionnest	#https://pubs.acs.org/doi/10.1021/acsnano.8b03871#
30	Ultrasensitive Solution-Processed Broadband PbSe Photodetectors through Photomultiplication Effect	2019	Gong	#https://pubs.acs.org/doi/10.1021/acsami.8b21966#
31	Ultra-sensitive solution-processed broadband photodetectors based on vertical field-effect transistor	2019	Zou	#https://iopscience.iop.org/article/10.1088/1361-6528/ab5a26#
32	Higher Quantum State Transitions in Colloidal Quantum Dot with Heavy Electron Doping	2016	Jeong	#https://pubs.acs.org/doi/10.1021/acs.jpcc.6b07331#
33	Synthesis and optical characterization of infra-red emitting mercury sulfide (HgS) quantum dots	2011	Curry	#https://pubs.rsc.org/en/content/articlelanding/2011/JM/c1jm10363f#!divAbstract
34	HgS and HgS/CdS Colloidal Quantum Dots with Infrared Intraband Transitions and Emergence of a Surface Plasmon	2016	Guyot-Sionnest	#https://pubs.acs.org/doi/10.1021/acs.jpcc.6b04014#
35	Mid-Wavelength Infrared Responsivity of Colloidal Quantum Dot/Organic Hybrid Photodetectors	2020	Ko	#https://iopscience.iop.org/article/10.1149/09701.0109ecst#
36	Air-Stable n-Doped Colloidal HgS Quantum Dots	2014	Guyot-Sionnest	#https://pubs.acs.org/doi/10.1021/jz500436x#
37	High electron mobility of β-HgS colloidal quantum dots with doubly occupied quantum states	2017	Jeong	#https://pubs.rsc.org/en/content/articlelanding/2017/RA/C7RA07193K#!divAbstract
38	Enhanced probabilities of phonon-assisted optical transitions in semiconductor quantum dots_x000D_ transitions in semiconductor quantum dots	2002	Klimin	#https://iopscience.iop.org/article/10.1088/0957-4484/13/2/307/pdf#
39	Negative-band-gap quantum dots: Gap collapse, intrinsic surface states, excitonic response, and_x000D_ excitonic insulator phase	2010	Bryant	#https://journals.aps.org/prb/pdf/10.1103/PhysRevB.82.155314#
40	Reversible Electrochemistry of Mercury Chalcogenide Colloidal Quantum Dot Films	2017	Guyot-Sionnest	#https://pubs.acs.org/doi/10.1021/acsnano.7b01014#
41	Schottky-ohmic converted contact, fast-response, infrared PbTe photodetector with stable photoresponse in air	2016	Wang	#https://pubs.rsc.org/en/content/articlelanding/2016/RA/c6ra22581k#!divAbstract
42	Air‐Stable, Near‐ to Mid‐Infrared Emitting Solids of PbTe/CdTe Core–Shell Colloidal quantum dots	2015	Kovalenko	#https://chemistry-europe.onlinelibrary.wiley.com/doi/full/10.1002/cphc.201501008#
43	Size controlled synthesis of monodisperse PbTe quantum dots: using oleylamine as the capping ligand	2012	Lombardi	#https://pubs.rsc.org/en/content/articlelanding/2012/JM/c2jm15540k#!divAbstract
44	PbTe Colloidal Nanocrystals: Synthesis, Characterization, and Multiple Exciton Generation	2006	Nozik	#https://pubs.acs.org/doi/10.1021/ja0574973#
45	A comprehensive approach for the instability of PbTe quantum dots and design of a combinatorial passivation strategy	2020	Asil	#https://www.sciencedirect.com/science/article/pii/S0927024819306889?via%3Dihub#
46	Sizing Curve, Absorption Coefficient, Surface Chemistry, and Aliphatic Chain Structure of PbTe Nanocrystals	2019	Vanmaekelbergh	#https://pubs.acs.org/doi/10.1021/acs.chemmater.8b05050#
47	A New Approach to the Synthesis of Lead Sulfide Colloidal Quantum Dots in a Mixture of Oleylamine and Oleic Acid	2020	Razumov	#https://link.springer.com/article/10.1134/S0018143920030133#
48	Ultrasensitive solution-cast quantum dot photodetectors	2006	Sargent	#https://www.nature.com/articles/nature04855#
49	Large‐Scale Programmable Synthesis of PbS Quantum Dots	2015	Krauss	#https://chemistry-europe.onlinelibrary.wiley.com/doi/full/10.1002/cphc.201500909#
50	Investigations on the morphology, optical and photoresponse properties of PbS/CdS binary colloidal quantum dot thin film	2014	Jiang	#https://link.springer.com/article/10.1007%2Fs10854-014-1904-4#
51	PbS Colloidal Quantum Dot Near Infrared Photoconductors: DC and Noise Characterization	2017	Venettacci	#https://onlinelibrary.wiley.com/doi/full/10.1002/pssc.201700185#
52	High Infrared Photoconductivity in Films of Arsenic-Sulfide-Encapsulated Lead-Sulfide Nanocrystals	2014	Heiss	#https://pubs.acs.org/doi/10.1021/nn5067478#
53	Interfacial Recombination for Fast Operation of a Planar Organic/QD Infrared Photodetector	2010	Bulovic	#https://onlinelibrary.wiley.com/doi/10.1002/adma.201002589#
54	PbS Colloidal Quantum Dot Photodetectors operating in the near infrared	2016	Foglia	#https://www.nature.com/articles/srep37913#
55	Tailoring the Electronic Properties of Colloidal Quantum Dots in Metal–Semiconductor Nanocomposites for High Performance Photodetectors	2015	Konstantatos	#https://onlinelibrary.wiley.com/doi/10.1002/smll.201403359#
56	Solution-processed inorganic bulk nano-heterojunctions and their application to solar cells	2012	Konstantatos	#https://www.nature.com/articles/nphoton.2012.139#Sec2
57	Air-stable short-wave infrared PbS colloidal quantum dot photoconductors passivated with Al2O3 atomic layer deposition	2014	Roelkens	#https://aip.scitation.org/doi/10.1063/1.4900930#
58	Wearable and sensitive heart-rate detectors based on PbS quantum dot and multiwalled carbon nanotube blend film	2014	Song	#https://aip.scitation.org/doi/10.1063/1.4898680#
59	Colloidal PbS Nanocrystals with Size-Tunable Near-Infrared Emission: Observation of Post-Synthesis Self-Narrowing of the Particle Size Distribution	2003	Scholes	#https://onlinelibrary.wiley.com/doi/epdf/10.1002/adma.200305395#
60	A Robust Strategy for “Living” Growth of Lead Sulfide Quantum Dots	2015	Dai	#https://onlinelibrary.wiley.com/doi/full/10.1002/cnma.201500110#
61	MWIR imaging with low cost colloidal quantum dot films	2016	Guyot-Sionnest	#https://www.spiedigitallibrary.org/conference-proceedings-of-spie/9933/993303/MWIR-imaging-with-low-cost-colloidal-quantum-dot-films/10.1117/12.2239986.full?SSO=1#
62	Precursor reactivity differentiation for single-step preparation of Ag2Se@Ag2S core–shell nanocrystals with distinct absorption and emission properties enabling sensitive near-infrared photodetection	2018	Li	#https://link.springer.com/article/10.1007/s10853-018-2465-3#
63	Ag2S QDs/Si Heterostructure-Based Ultrasensitive SWIR Range Detector	2020	Goltsman	#https://www.mdpi.com/2079-4991/10/5/861#
64	Synthesis of silver sulfide nanoparticles and their photodetector applications	2018	Park	#https://pubs.rsc.org/en/content/articlelanding/2018/RA/C8RA03306D#!divAbstract
65	Room Temperature Silicon Detector for IR Range Coated with Ag2S Quantum Dots	2019	Goltsman	#https://onlinelibrary.wiley.com/doi/full/10.1002/pssr.201900187#
66	Origin of Unusual Excitonic Absorption and Emission from Colloidal Ag2S Nanocrystals: Ultrafast Photophysics and Solar Ce	2015	Nag	#https://pubs.acs.org/doi/10.1021/acs.jpclett.5b01692#
67	Ag2S Quantum Dots as an Infrared Excited Photocatalyst for Hydrogen Production	2019	Guo	#https://pubs.acs.org/doi/10.1021/acsaem.9b00091#
68	Near-Infrared Absorption of Monodisperse Silver Telluride (Ag2Te) Nanocrystals and Photoconductive Response of Their Self-Assembled Superlattices	2011	Murray	#https://pubs.acs.org/doi/10.1021/cm2019795#
69	Ag2Te Quantum Dots as Contrast Agents for Near-Infrared Fluorescence and Computed Tomography Imaging	2020	Tian	#https://pubs.acs.org/doi/10.1021/acsanm.0c01274#
70	Vertically Stacked Intraband Quantum Dot Devices for Mid-_x000D_ Wavelength Infrared Photodetection	2021	Ko	#https://pubs.acs.org/doi/pdf/10.1021/acsami.0c19450#
71	Ligand engineering of mid-infrared Ag2Se colloidal quantum dots	2020	Ko	#https://www.sciencedirect.com/science/article/pii/S1386947720304768#
72	Mid-Infrared Colloidal Quantum Dot Based Nanoelectronics and Nanooptoelectronics	2019	Ko	#https://iopscience.iop.org/article/10.1149/09201.0011ecst/meta#
73	Engineering the Temporal Response of_x000D_ Photoconductive Photodetectors via_x000D_ Selective Introduction of Surface Trap_x000D_ States	2008	Sargent	#https://pubs.acs.org/doi/abs/10.1021/nl080373e#
74	PbS colloidal quantum dot photoconductive photodetectors: Transport, traps, and gain	2007	Sargent	#https://aip.scitation.org/doi/full/10.1063/1.2800805#
75	Mid- and Long-Wave Infrared Optoelectronics via Intraband Transitions in PbS Colloidal Quantum Dots	2020	Konstantatos	#https://pubs.acs.org/doi/full/10.1021/acs.nanolett.9b04130#
76	Dual-band infrared imaging using stacked colloidal quantum dot photodiodes	2019	Guyot-Sionnest	#https://www.nature.com/articles/s41566-019-0362-1#
77	HgTe Nanocrystals for SWIR Detection and Their Integration up to the Focal Plane Array	2019	Lhuillier	#https://pubs.acs.org/doi/full/10.1021/acsami.9b09954#
78	A colloidal quantum dot infrared photodetector and its use for intraband detection	2019	Lhuillier	#https://www.nature.com/articles/s41467-019-10170-8#
79	Mercury Telluride Colloidal Quantum Dots: Electronic Structure, Size-Dependent Spectra, and Photocurrent Detection up to 12 μm	2014	Guyot-Sionnest	#https://pubs.acs.org/doi/full/10.1021/nn503805h#
80	Pushing PbS/Metal-Halide-Perovskite Core/Epitaxial-_x000D_ Ligand-Shell Nanocrystal Photodetectors beyond 3 μm_x000D_ Wavelength	2019	Heiss	#https://onlinelibrary.wiley.com/doi/epdf/10.1002/adfm.201807964#
